# Supplementary figures and images for: Validity of the International Classification of Diseases 10th revision code for hospitalisation with hyponatraemia in elderly patients
Source: HighWire-hosted journal article supplement (doi:10.1136/bmjopen-2012-001727), 2012-01-01

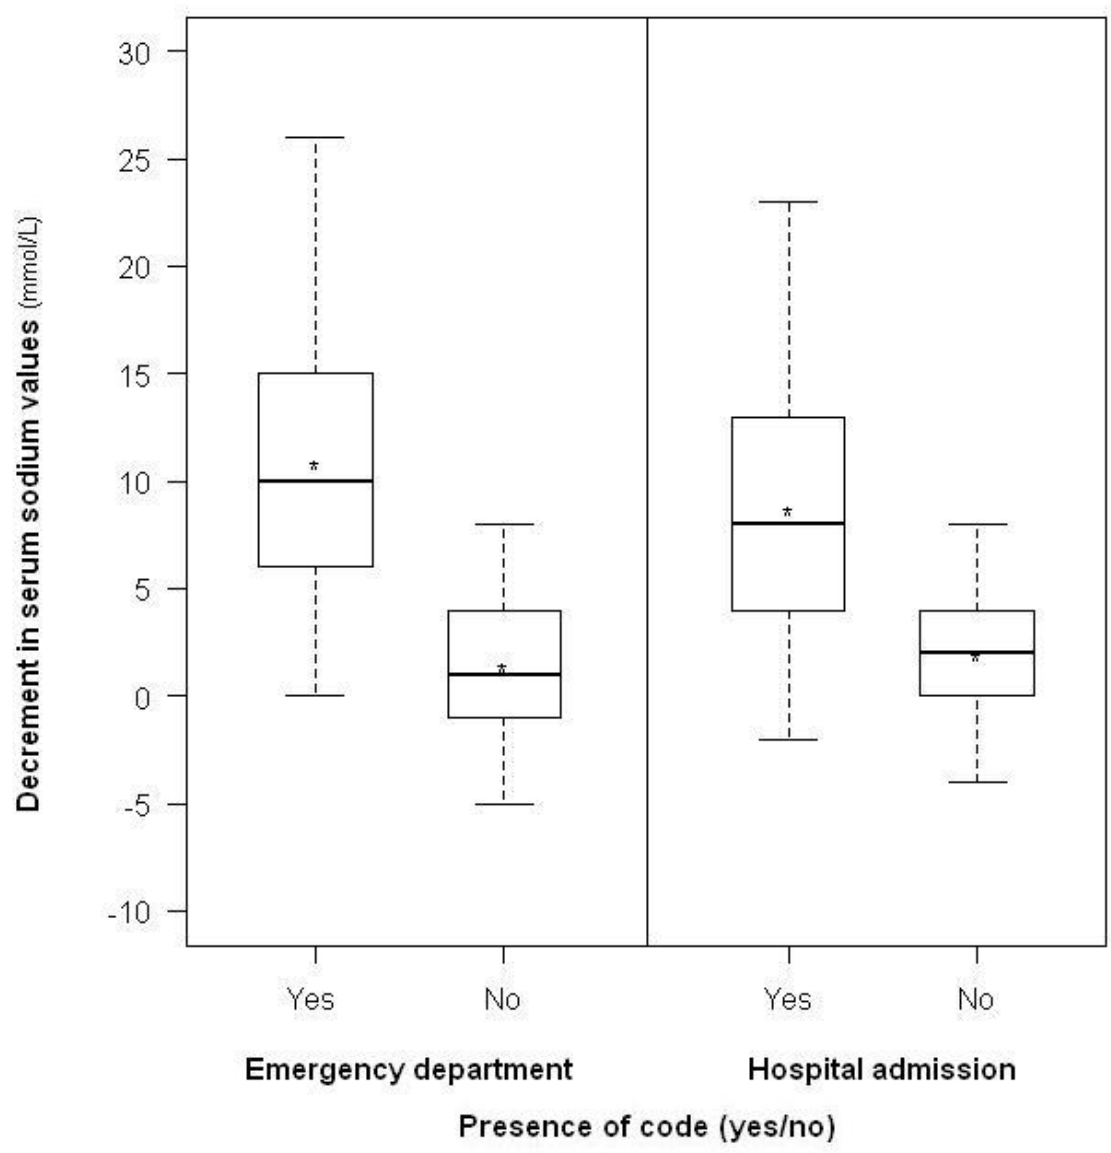

Supplement: bmjopen-2012-001727supp_appendix5.pdf [file bmjopen-2012-001727supp_appendix5.pdf]
